# Supplementary material for: Moderate levels of dietary arachidonic acid reduced lipid accumulation and tended to inhibit cell cycle progression in the liver of Japanese seabass Lateolabrax japonicus
Source: PubMed Central journal article supplement (PMC6048150; doi:10.1038/s41598-018-28867-z), 2018-07-16
Supplement: 41598_2018_28867_MOESM1_ESM.pdf [file 41598_2018_28867_MOESM1_ESM.pdf]

**SUPPLEMENTARY INFORMATION:**

**Moderate levels of dietary arachidonic acid reduced lipid  
accumulation and tended to inhibit cell cycle progression in the liver  
of Japanese seabass *Lateolabrax japonicus***

Houguo Xu<sup>1</sup>, Chengqiang Wang<sup>1</sup>, Yuanqin Zhang<sup>1</sup>, Yuliang Wei<sup>1</sup>, Mengqing Liang<sup>\*1,2</sup>

<sup>1</sup>Yellow Sea Fisheries Research Institute, Chinese Academy of Fishery Sciences, 106 Nanjing  
Road, Qingdao, 266071 Shandong, China

<sup>2</sup>Laboratory for Marine Fisheries Science and Food Production Processes, Qingdao National  
Laboratory for Marine Science and Technology, 1 Wenhai Road, Qingdao, 266237 Shandong,  
China

**\*Corresponding author:** Mengqing Liang, E-mail: liangmq@ysfri.ac.cn

**Supplementary Table S1. Clean data and quality control.**

| Sample     | Raw Reads  | Clean Reads | Clean Bases | Error (%) | Q20 (%) | Q30 (%) | GC Content (%) |
|------------|------------|-------------|-------------|-----------|---------|---------|----------------|
| ARA-0.05_1 | 61,590,114 | 57,285,590  | 8.59 G      | 0.02      | 96.64   | 90.87   | 48.57          |
| ARA-0.05_2 | 57,541,780 | 53,078,734  | 7.96 G      | 0.02      | 96.47   | 90.49   | 49.65          |
| ARA-0.05_3 | 58,486,918 | 45,451,256  | 6.82 G      | 0.02      | 96.82   | 90.23   | 49.70          |
| ARA-0.37_1 | 62,357,214 | 53,071,432  | 7.96 G      | 0.02      | 97.08   | 91.43   | 48.42          |
| ARA-0.37_2 | 58,575,334 | 52,696,304  | 7.90 G      | 0.02      | 96.77   | 90.94   | 49.31          |
| ARA-0.37_3 | 61,039,602 | 59,417,542  | 8.91 G      | 0.02      | 95.74   | 89.54   | 49.10          |

Q20 and Q30: the sequencing error rate 0.01 and 0.001 respectively.

**Supplementary Table S2. Length distribution of transcripts and unigenes.**

| Transcript length interval | 200-500 bp | 500-1k bp | 1k-2k bp | >2k bp | Total   |
|----------------------------|------------|-----------|----------|--------|---------|
| Number of transcripts      | 145,811    | 42,334    | 33,836   | 39,966 | 261,947 |
| Number of unigenes         | 133,117    | 29,326    | 15,570   | 13,844 | 191,857 |

**Supplementary Table S3. Annotation of the unigenes.**

| Annotated in database              | Number of unigenes | Percentage (%) |
|------------------------------------|--------------------|----------------|
| Annotated in NR                    | 46,692             | 24.33          |
| Annotated in NT                    | 66,582             | 34.70          |
| Annotated in KO                    | 25,420             | 13.24          |
| Annotated in SwissProt             | 38,541             | 20.08          |
| Annotated in PFAM                  | 37,741             | 19.67          |
| Annotated in GO                    | 37,959             | 19.78          |
| Annotated in KOG                   | 21,546             | 11.23          |
| Annotated in all Databases         | 12,801             | 6.67           |
| Annotated in at least one Database | 81,636             | 42.55          |
| Total Unigenes                     | 191,857            | 100            |

**Supplementary Table S4. Formulation and proximate composition of the experiment diets (% dry matter).**

| Ingredients                   | Dietary ARA level (% dry matter) |       |       |       |       |       |
|-------------------------------|----------------------------------|-------|-------|-------|-------|-------|
|                               | 0.05                             | 0.22  | 0.37  | 0.60  | 1.38  | 2.32  |
| Fish meal                     | 15.00                            | 15.00 | 15.00 | 15.00 | 15.00 | 15.00 |
| Soybean meal                  | 20.00                            | 20.00 | 20.00 | 20.00 | 20.00 | 20.00 |
| Wheat meal                    | 30.85                            | 30.85 | 30.85 | 30.85 | 30.85 | 30.85 |
| Casein                        | 16.00                            | 16.00 | 16.00 | 16.00 | 16.00 | 16.00 |
| Gelatin                       | 4.00                             | 4.00  | 4.00  | 4.00  | 4.00  | 4.00  |
| Mineral premix <sup>a</sup>   | 2.00                             | 2.00  | 2.00  | 2.00  | 2.00  | 2.00  |
| Vitamin premix <sup>b</sup>   | 2.00                             | 2.00  | 2.00  | 2.00  | 2.00  | 2.00  |
| Attractant <sup>c</sup>       | 0.30                             | 0.30  | 0.30  | 0.30  | 0.30  | 0.30  |
| Mold inhibitor <sup>d</sup>   | 0.10                             | 0.10  | 0.10  | 0.10  | 0.10  | 0.10  |
| Ethoxyquin                    | 0.05                             | 0.05  | 0.05  | 0.05  | 0.05  | 0.05  |
| Soy lecithin                  | 1.20                             | 1.20  | 1.20  | 1.20  | 1.20  | 1.20  |
| DHA enriched oil <sup>e</sup> | 1.50                             | 1.50  | 1.50  | 1.50  | 1.50  | 1.50  |
| ARA enriched oil <sup>f</sup> | 0.00                             | 0.35  | 0.71  | 1.45  | 2.91  | 5.84  |
| Tristearin <sup>g</sup>       | 7.00                             | 6.65  | 6.29  | 5.55  | 4.09  | 1.16  |
| <i>Proximate composition</i>  |                                  |       |       |       |       |       |
| Crude protein                 | 43.64                            | 43.53 | 44.40 | 44.36 | 43.39 | 44.13 |
| Crude lipid                   | 11.32                            | 11.07 | 11.09 | 11.24 | 11.50 | 11.22 |
| Ash                           | 6.89                             | 6.94  | 6.81  | 6.98  | 6.92  | 6.83  |

<sup>a</sup>Mineral premix (mg or g/kg diet): MgSO<sub>4</sub>·7H<sub>2</sub>O, 1200 mg; CuSO<sub>4</sub>·5H<sub>2</sub>O, 10 mg; ZnSO<sub>4</sub>·H<sub>2</sub>O, 50 mg; FeSO<sub>4</sub>·H<sub>2</sub>O, 80 mg; MnSO<sub>4</sub>·H<sub>2</sub>O, 45 mg; CoCl<sub>2</sub>·6H<sub>2</sub>O (1%), 50 mg; NaSeSO<sub>3</sub>·5H<sub>2</sub>O (1%), 20mg; Ca(IO<sub>3</sub>)<sub>2</sub>·6H<sub>2</sub>O (1%), 60mg; CaH<sub>2</sub>PO<sub>4</sub>·H<sub>2</sub>O, 10g; zoelite, 8.485 g.

<sup>b</sup>Vitamin premix (mg or g/kg diet): thiamin 25 mg; riboflavin, 45 mg; pyridoxine HCl, 20 mg; vitamin B<sub>12</sub> (1%), 10 mg; vitamin K<sub>3</sub>, 10 mg; inositol, 800 mg; pantothenic acid, 60 mg; niacin, 200 mg; folic acid, 20 mg; biotin (2%), 60 mg; retinol acetate, 32 mg; cholecalciferol, 5 mg; alpha-tocopherol (50%), 240 mg; ascorbic acid, 5 g; choline chloride (50%), 5 g; wheat middling, 4.47 g.

<sup>c</sup>Attractant: glycine and betaine.

<sup>d</sup>Mold inhibitor: contained 50% calcium propionic acid and 50% fumaric acid.

<sup>e</sup>DHA enriched oil: DHA content, 43% of total fatty acid; in the form of triglyceride; Jiangsu Tiangkai Biotechnology Co., Ltd., Nanjing, China.

<sup>f</sup>ARA enriched oil: ARA content, 46% of total fatty acid; in the form of triglyceride; Jiangsu

Tiankai Biotechnology Co., Ltd., Nanjing, China.

<sup>g</sup>Tristearin: HUDONG article of everyday use Co., Ltd., Jiaxing, China.

**Supplementary Table S5. Fatty acid profiles of experimental diets (% total fatty acid).**

| Fatty acid                  | ARA-0.05 | ARA-0.22 | ARA-0.37 | ARA-0.60 | ARA-1.38 | ARA-2.32 |
|-----------------------------|----------|----------|----------|----------|----------|----------|
| C14:0                       | 3.50     | 3.61     | 3.61     | 3.50     | 3.00     | 2.38     |
| C16:0                       | 26.62    | 27.12    | 26.62    | 25.91    | 22.38    | 17.35    |
| C18:0                       | 44.46    | 44.10    | 41.84    | 38.76    | 29.18    | 12.88    |
| $\Sigma$ SFA                | 74.58    | 74.83    | 72.07    | 68.17    | 54.56    | 32.61    |
| C16:1n-7                    | 0.79     | 0.81     | 0.84     | 0.88     | 0.87     | 0.92     |
| C18:1n-9                    | 3.87     | 3.42     | 3.69     | 3.85     | 5.16     | 6.72     |
| $\Sigma$ MUFA               | 4.66     | 4.23     | 4.53     | 4.73     | 6.03     | 7.64     |
| C18:2n-6                    | 7.32     | 8.05     | 8.21     | 8.72     | 9.71     | 12.19    |
| C20:4n-6                    | 0.26     | 1.24     | 3.04     | 5.97     | 11.44    | 22.86    |
| $\Sigma$ n-6 PUFA           | 7.32     | 9.29     | 11.25    | 14.69    | 21.15    | 35.05    |
| C18:3n-3                    | 0.70     | 0.76     | 0.81     | 0.80     | 0.85     | 0.92     |
| C20:5n-3                    | 1.37     | 1.44     | 1.49     | 1.49     | 1.65     | 1.57     |
| C22:6n-3                    | 6.26     | 6.39     | 6.59     | 6.63     | 6.60     | 6.66     |
| $\Sigma$ n-3 PUFA           | 8.33     | 8.59     | 8.89     | 8.92     | 9.10     | 9.15     |
| $\Sigma$ PUFA               | 15.65    | 17.88    | 20.14    | 23.61    | 30.25    | 44.20    |
| $\Sigma$ SFA/ $\Sigma$ PUFA | 4.77     | 4.19     | 3.58     | 2.89     | 1.80     | 0.74     |
| $\Sigma$ n-3/ $\Sigma$ n-6  | 1.14     | 0.92     | 0.79     | 0.61     | 0.43     | 0.26     |

SFA, saturated fatty acid; MUFA, monounsaturated fatty acid; PUFA, polyunsaturated fatty acid.

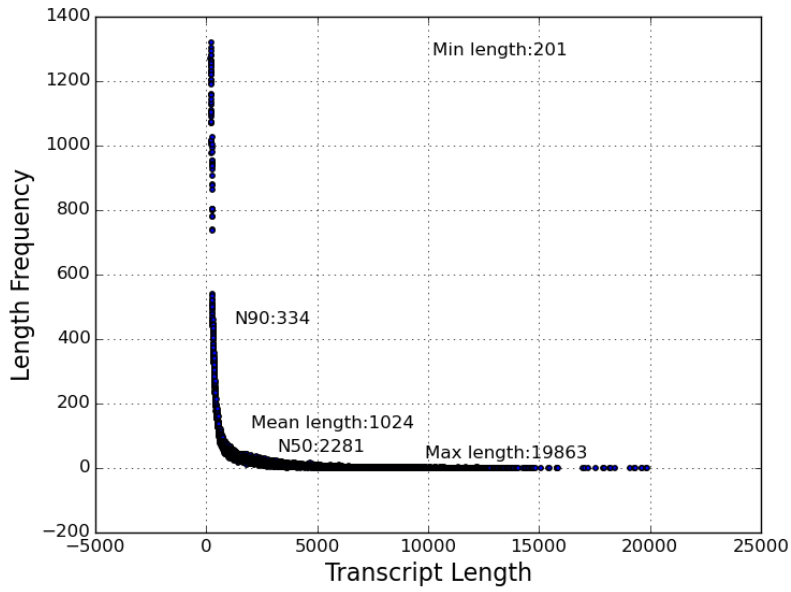

**Supplementary Fig. S1. Length distribution of transcripts.** N50 (N90): length of the transcript, longer than which the cumulative length of transcripts accounts for 50% (90%) of the total cumulative length.



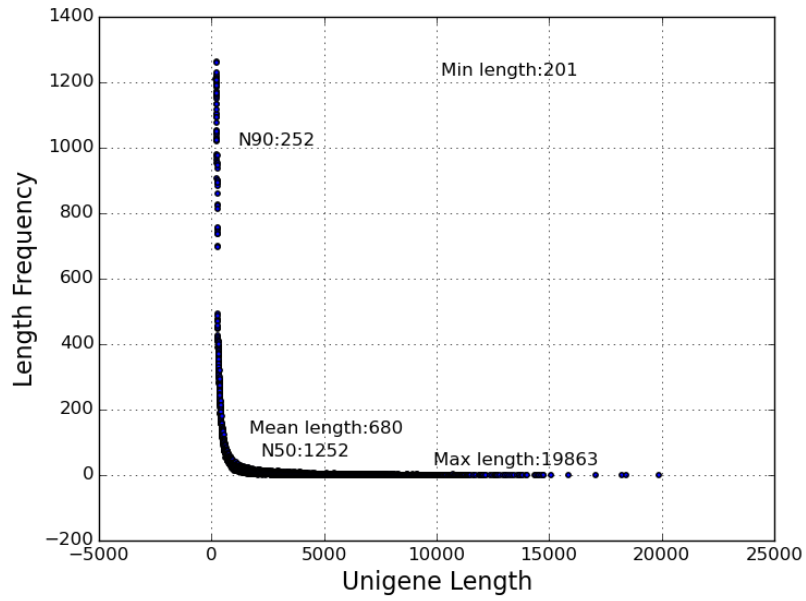

**Supplementary Fig. S2. Length distribution of unigenes.** N50 (N90): length of the unigene, longer than which the cumulative length of unigenes accounts for 50% (90%) of the total cumulative length.

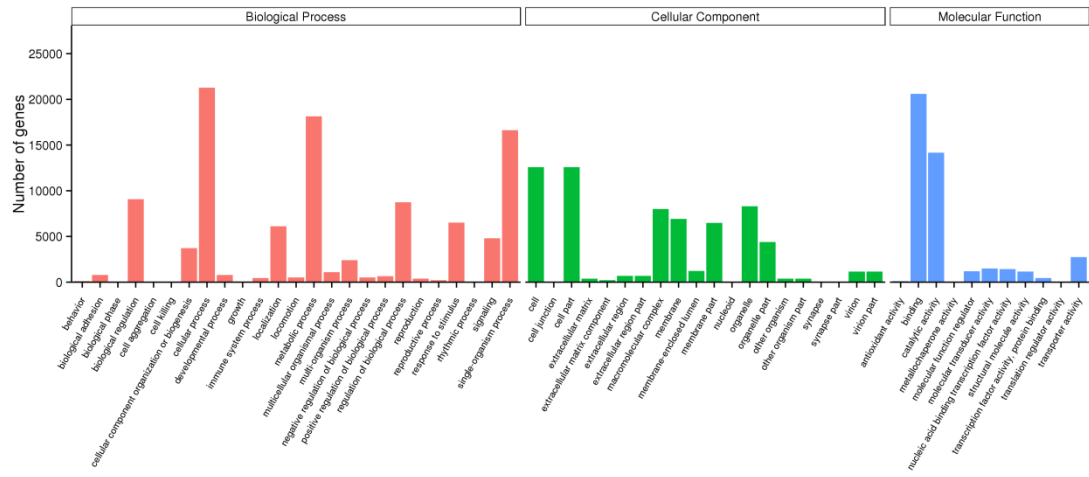

**Supplementary Fig. S3. Gene function classification (GO) of unigenes.**

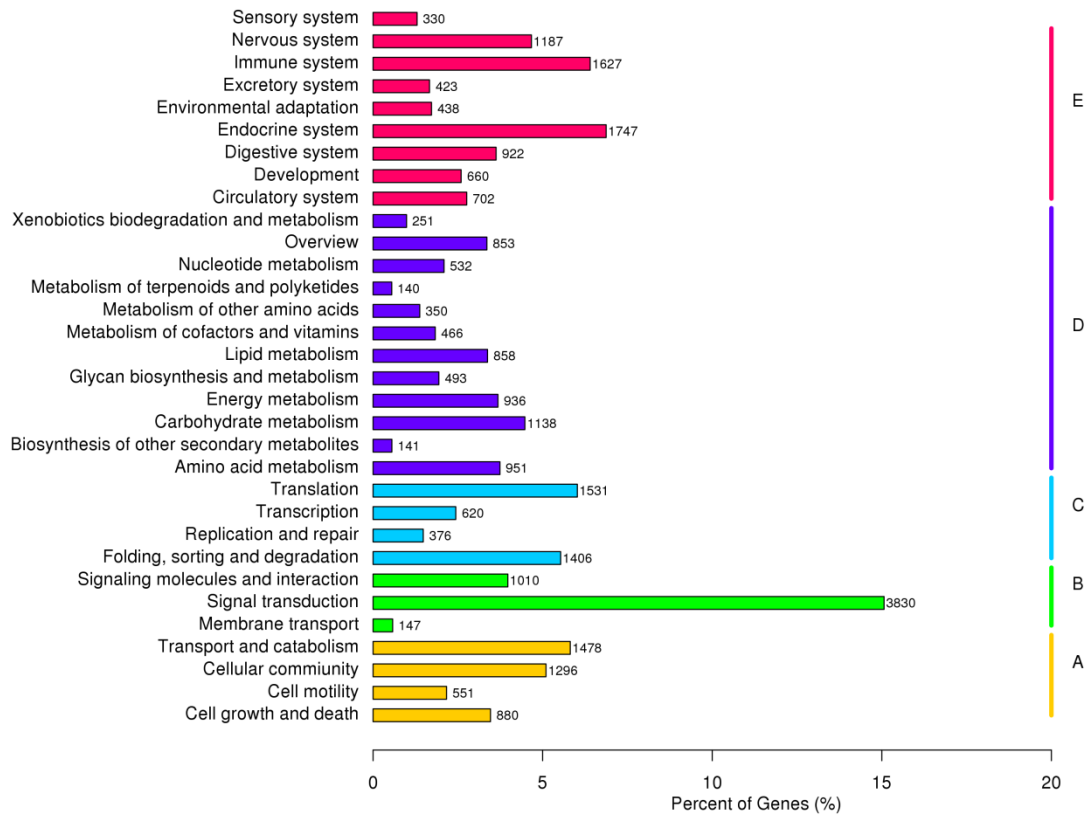

**Supplementary Fig. S4. KEGG classification of unigenes.** A: cellular processes; B: environmental information processing; C: genetic information processing; D: metabolism; E: organismal systems.

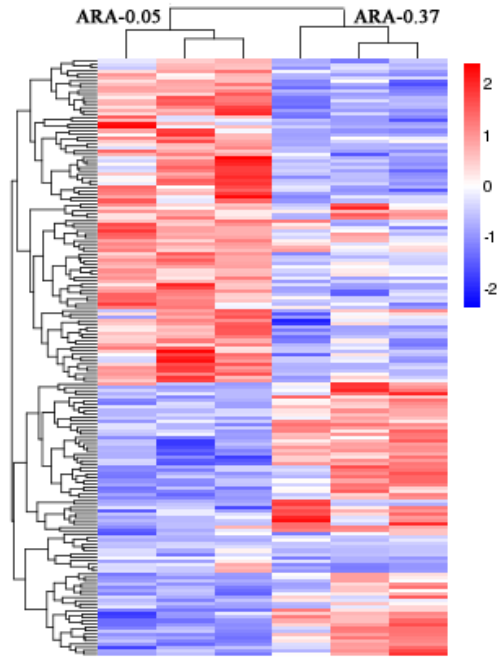

**Supplementary Fig. S5. Cluster analysis of differentially expressed genes.**
